# Supplementary material for: Behavior change due to COVID-19 among dental academics—The theory of planned behavior: Stresses, worries, training, and pandemic severity
Source: PubMed Central journal article supplement (PMC7523990; doi:10.1371/journal.pone.0239961), 2020-09-29

# PLOS ONE

## Behavior change due to COVID-19 among dental academics - The theory of planned behavior: stresses, worries, training, and pandemic severity --Manuscript Draft--

|                              |                                                                                                                                                                                                                                                                                                                                                                                                                                                                                                                                                                                                                                                                                                                                                                                                                                                                                                                                                                                                                                                                                                                                                                                                                                                                                                                                                                                                                                                                                                                                                                                                                                                                                                                                                                                                                                                                                                                                                                                                                                                                                                                                                                                                                                                  |
|------------------------------|--------------------------------------------------------------------------------------------------------------------------------------------------------------------------------------------------------------------------------------------------------------------------------------------------------------------------------------------------------------------------------------------------------------------------------------------------------------------------------------------------------------------------------------------------------------------------------------------------------------------------------------------------------------------------------------------------------------------------------------------------------------------------------------------------------------------------------------------------------------------------------------------------------------------------------------------------------------------------------------------------------------------------------------------------------------------------------------------------------------------------------------------------------------------------------------------------------------------------------------------------------------------------------------------------------------------------------------------------------------------------------------------------------------------------------------------------------------------------------------------------------------------------------------------------------------------------------------------------------------------------------------------------------------------------------------------------------------------------------------------------------------------------------------------------------------------------------------------------------------------------------------------------------------------------------------------------------------------------------------------------------------------------------------------------------------------------------------------------------------------------------------------------------------------------------------------------------------------------------------------------|
| <b>Manuscript Number:</b>    | PONE-D-20-20341                                                                                                                                                                                                                                                                                                                                                                                                                                                                                                                                                                                                                                                                                                                                                                                                                                                                                                                                                                                                                                                                                                                                                                                                                                                                                                                                                                                                                                                                                                                                                                                                                                                                                                                                                                                                                                                                                                                                                                                                                                                                                                                                                                                                                                  |
| <b>Article Type:</b>         | Research Article                                                                                                                                                                                                                                                                                                                                                                                                                                                                                                                                                                                                                                                                                                                                                                                                                                                                                                                                                                                                                                                                                                                                                                                                                                                                                                                                                                                                                                                                                                                                                                                                                                                                                                                                                                                                                                                                                                                                                                                                                                                                                                                                                                                                                                 |
| <b>Full Title:</b>           | Behavior change due to COVID-19 among dental academics - The theory of planned behavior: stresses, worries, training, and pandemic severity                                                                                                                                                                                                                                                                                                                                                                                                                                                                                                                                                                                                                                                                                                                                                                                                                                                                                                                                                                                                                                                                                                                                                                                                                                                                                                                                                                                                                                                                                                                                                                                                                                                                                                                                                                                                                                                                                                                                                                                                                                                                                                      |
| <b>Short Title:</b>          | Dental academics' COVID-19 behavior                                                                                                                                                                                                                                                                                                                                                                                                                                                                                                                                                                                                                                                                                                                                                                                                                                                                                                                                                                                                                                                                                                                                                                                                                                                                                                                                                                                                                                                                                                                                                                                                                                                                                                                                                                                                                                                                                                                                                                                                                                                                                                                                                                                                              |
| <b>Corresponding Author:</b> | Maha El Tantawi<br>Alexandria University Faculty of Dentistry<br>Alexandria, Alexandria EGYPT                                                                                                                                                                                                                                                                                                                                                                                                                                                                                                                                                                                                                                                                                                                                                                                                                                                                                                                                                                                                                                                                                                                                                                                                                                                                                                                                                                                                                                                                                                                                                                                                                                                                                                                                                                                                                                                                                                                                                                                                                                                                                                                                                    |
| <b>Keywords:</b>             | Dental faculty; COVID-19; psychological stresses; fear; training; surveys and questionnaires; multilevel analysis                                                                                                                                                                                                                                                                                                                                                                                                                                                                                                                                                                                                                                                                                                                                                                                                                                                                                                                                                                                                                                                                                                                                                                                                                                                                                                                                                                                                                                                                                                                                                                                                                                                                                                                                                                                                                                                                                                                                                                                                                                                                                                                                |
| <b>Abstract:</b>             | <p><b>Purpose</b><br/>COVID-19 pandemic led to major life changes. We assessed the psychological impact of COVID-19 on dental academics globally and on changes in their behaviors.</p> <p><b>Method</b><br/>We invited dental academics to complete a cross-sectional, online survey from March to May 2020. The survey was based on the Theory of Planned Behavior (TPB). The survey assessed stress levels (using the Impact of Event Scale), fears, and worries because of COVID-19 extracted by Principal Component Analysis (PCA) (attitudes in the TPB), participants' training to manage public health emergencies (control in the TPB), and personal and professional backgrounds. We used multilevel regression models to assess the association between frequent handwashing and avoidance of crowded places (outcome variables) and explanatory variables; stresses, fears, training, and country-level COVID-19 deaths to cases ratio representing fatality rate (norms in the TPB).</p> <p><b>Results</b><br/>1862 academics from 28 countries participated in the survey (response rate= 11.3%). Of those, 53.4% were female and 32.9% were &lt;46 years old. Severe stress was identified in 9.9%. PCA extracted three main factors: fear of infection, worries because of professional responsibilities, and because of restricted mobility. These factors showed a significant dose-dependent association with stress levels and were also significantly associated with more frequent handwashing (B= 0.56, 0.33, and 0.34) and avoiding crowded places (B= 0.55, 0.30, and 0.28). Low fatality rates were significantly associated with more handwashing (B= -2.82) and avoiding crowded places (B= -6.61). Training was not significantly associated with behavior change (B= -0.01 and -0.11).</p> <p><b>Conclusions</b><br/>COVID-19 had a considerable psychologic impact on dental academics. There was a direct, dose-dependent relationship between change in behaviors and worries and fears but no association with training. More change in behaviors was associated with lower COVID-19 fatality rates. Fears and stresses were associated with greater adoption of preventive measures against the pandemic.</p> |
| <b>Order of Authors:</b>     | <p>Nour Ammar</p> <p>Nourhan M. Aly</p> <p>Morenike O. Folayan</p> <p>Yousef Khader</p> <p>Jorma Virtanen</p> <p>Ola B. Al-Bateynah</p>                                                                                                                                                                                                                                                                                                                                                                                                                                                                                                                                                                                                                                                                                                                                                                                                                                                                                                                                                                                                                                                                                                                                                                                                                                                                                                                                                                                                                                                                                                                                                                                                                                                                                                                                                                                                                                                                                                                                                                                                                                                                                                          |

|                      |
|----------------------|
| Simin Z. Mohebbi     |
| Sameh Attia          |
| Hans-Peter Howaldt   |
| Sebastian Boettger   |
| Diah A. Maharani     |
| Anton Rahardjo       |
| Imran Khan           |
| Marwa Madi           |
| Maher Rashwan        |
| Verica Pavlic        |
| Smiljka Cicmil       |
| Youn-Hee Choi        |
| Easter Joury         |
| Jorge L. Castillo    |
| Kanako Noritake      |
| Anas Shamala         |
| Gabriella Galluccio  |
| Antonella Polimeni   |
| Prathip Phantumvanit |
| Davide Mancino       |
| Jin-Bom Kim          |
| Maha M. Abdelsalam   |
| Arheiam AlAwami      |
| Mai A. Dama          |
| Myat Nyan            |
| Iyad Hussein         |
| Mohamed M. AlKeshan  |
| Ana P. Vukovic       |
| Alfredo landolo      |
| Arthur M. Kemoli     |
| Maha El Tantawi      |

**Additional Information:**

| Question                                                                                                                                                                                                                                                                                                                 | Response                                                       |
|--------------------------------------------------------------------------------------------------------------------------------------------------------------------------------------------------------------------------------------------------------------------------------------------------------------------------|----------------------------------------------------------------|
| <p><b>Financial Disclosure</b></p> <p>Enter a financial disclosure statement that describes the sources of funding for the work included in this submission. Review the <a href="#">submission guidelines</a> for detailed requirements. View published research articles from <a href="#">PLOS ONE</a> for specific</p> | <p>The authors received no specific funding for this work.</p> |

examples.

This statement is required for submission and **will appear in the published article** if the submission is accepted. Please make sure it is accurate.

#### Unfunded studies

Enter: *The author(s) received no specific funding for this work.*

#### Funded studies

Enter a statement with the following details:

- Initials of the authors who received each award
- Grant numbers awarded to each author
- The full name of each funder
- URL of each funder website
- Did the sponsors or funders play any role in the study design, data collection and analysis, decision to publish, or preparation of the manuscript?
- **NO** - Include this sentence at the end of your statement: *The funders had no role in study design, data collection and analysis, decision to publish, or preparation of the manuscript.*
- **YES** - Specify the role(s) played.

\* typeset

#### Competing Interests

Use the instructions below to enter a competing interest statement for this submission. On behalf of all authors, disclose any [competing interests](#) that could be perceived to bias this work—acknowledging all financial support and any other relevant financial or non-financial competing interests.

This statement **will appear in the published article** if the submission is accepted. Please make sure it is accurate. View published research articles from [PLOS ONE](#) for specific examples.

The authors have declared that no competing interests exist.

**NO authors have competing interests**

Enter: *The authors have declared that no competing interests exist.*

**Authors with competing interests**

Enter competing interest details beginning with this statement:

*I have read the journal's policy and the authors of this manuscript have the following competing interests: [insert competing interests here]*

\* typeset

**Ethics Statement**

Enter an ethics statement for this submission. This statement is required if the study involved:

- Human participants
- Human specimens or tissue
- Vertebrate animals or cephalopods
- Vertebrate embryos or tissues
- Field research

Write "N/A" if the submission does not require an ethics statement.

General guidance is provided below. Consult the [submission guidelines](#) for detailed instructions. **Make sure that all information entered here is included in the Methods section of the manuscript.**

The study was approved by the Research Ethics Committee of the Faculty of Dentistry, Alexandria University, Egypt (IRB 00010556)-(IORG 0008839). In an online survey, participants who completed the survey were considered to have provided written implicit consent.

**Format for specific study types**

**Human Subject Research (involving human participants and/or tissue)**

- Give the name of the institutional review board or ethics committee that approved the study
- Include the approval number and/or a statement indicating approval of this research
- Indicate the form of consent obtained (written/oral) or the reason that consent was not obtained (e.g. the data were analyzed anonymously)

**Animal Research (involving vertebrate animals, embryos or tissues)**

- Provide the name of the Institutional Animal Care and Use Committee (IACUC) or other relevant ethics board that reviewed the study protocol, and indicate whether they approved this research or granted a formal waiver of ethical approval
- Include an approval number if one was obtained
- If the study involved *non-human primates*, add *additional details* about animal welfare and steps taken to ameliorate suffering
- If anesthesia, euthanasia, or any kind of animal sacrifice is part of the study, include briefly which substances and/or methods were applied

**Field Research**

Include the following details if this study involves the collection of plant, animal, or other materials from a natural setting:

- Field permit number
- Name of the institution or relevant body that granted permission

**Data Availability**

Authors are required to make all data underlying the findings described fully available, without restriction, and from the time of publication. PLOS allows rare exceptions to address legal and ethical concerns. See the [PLOS Data Policy](#) and [FAQ](#) for detailed information.

Yes - all data are fully available without restriction

A Data Availability Statement describing where the data can be found is required at submission. Your answers to this question constitute the Data Availability Statement and **will be published in the article**, if accepted.

**Important:** Stating 'data available on request from the author' is not sufficient. If your data are only available upon request, select 'No' for the first question and explain your exceptional situation in the text box.

Do the authors confirm that all data underlying the findings described in their manuscript are fully available without restriction?

**Describe where the data may be found in full sentences. If you are copying our sample text, replace any instances of XXX with the appropriate details.**

- If the data are **held or will be held in a public repository**, include URLs, accession numbers or DOIs. If this information will only be available after acceptance, indicate this by ticking the box below. For example: *All XXX files are available from the XXX database (accession number(s) XXX, XXX).*
- If the data are all contained **within the manuscript and/or Supporting Information files**, enter the following: *All relevant data are within the manuscript and its Supporting Information files.*
- If neither of these applies but you are able to provide **details of access elsewhere**, with or without limitations, please do so. For example:

*Data cannot be shared publicly because of [XXX]. Data are available from the XXX Institutional Data Access / Ethics Committee (contact via XXX) for researchers who meet the criteria for access to confidential data.*

*The data underlying the results presented in the study are available from (include the name of the third party*

The dataset is attached as an Excel file.

*and contact information or URL).*

- This text is appropriate if the data are owned by a third party and authors do not have permission to share the data.

\* typeset

Additional data availability information:

1 **Behavior change due to COVID-19 among dental academics - The theory**  
2 **of planned behavior: stresses, worries, training, and pandemic severity.**

3  
4 Nour Ammar<sup>1</sup>, Nourhan M. Aly<sup>1</sup>, Morenike O. Folayan<sup>2</sup>, Yousef Khader<sup>3</sup>, Jorma Virtanen<sup>4</sup>,  
5 Ola B. Al-Batayneh<sup>5</sup>, Simin Z. Mohebbi<sup>6</sup>, Sameh Attia<sup>7</sup>, Hans-Peter Howaldt<sup>7</sup>, Sebastian  
6 Boettger<sup>7</sup>, Diah A. Maharani<sup>8</sup>, Anton Rahardjo<sup>8</sup>, Imran Khan<sup>9</sup>, Marwa Madi<sup>10</sup>, Maher  
7 Rashwan<sup>11</sup>, Verica Pavlic<sup>12</sup>, Smiljka Cicmil<sup>12</sup>, Youn-Hee Choi<sup>13</sup>, Easter Joury<sup>14</sup>, Jorge L.  
8 Castillo<sup>15</sup>, Kanako Noritake<sup>16</sup>, Anas Shamala<sup>17</sup>, Gabriella Galluccio<sup>18</sup>, Antonella Polimeni<sup>18</sup>,  
9 Prathip Phantumvanit<sup>19</sup>, Davide Mancino<sup>20</sup>, Jin-Bom Kim<sup>21</sup>, Maha M. Abdelsalam<sup>22</sup>,  
10 Arheiam Arheiam<sup>23</sup>, Mai A. Dama<sup>24</sup>, Myat Nyan<sup>25</sup>, Iyad Hussein<sup>26</sup>, Mohammad M.  
11 Alkeshan<sup>27</sup>, Ana P. Vukovic<sup>28</sup>, Alfredo Iandolo<sup>29</sup>, Arthur M. Kemoli<sup>30</sup>, Maha El Tantawi<sup>1\*</sup>.

12  
13 <sup>1</sup> Department of Pediatric Dentistry and Dental Public Health, Faculty of Dentistry,  
14 Alexandria University, Alexandria, Egypt.

15 <sup>2</sup> Department of Child Dental Health, Obafemi Awolowo University, Ile-Ife, Nigeria.

16 <sup>3</sup> Department of Public Health, Jordan University of Science and Technology, Irbid, Jordan.

17 <sup>4</sup> Department of Clinical Dentistry, Faculty of Medicine, University of Bergen, Bergen,  
18 Norway.

19 <sup>5</sup> Department of Preventive Dentistry, Faculty of Dentistry, Jordan University of Science and  
20 Technology, Irbid, Jordan.

21 <sup>6</sup> Research Center for Caries Prevention, Dentistry Research Institute, Tehran University of  
22 Medical Sciences, Tehran, Iran. Professor, Community Oral Health Department, School of  
23 Dentistry, Tehran University of Medical Sciences, Tehran, Iran.

24 <sup>7</sup> Department of Cranio-Maxillofacial Surgery, Justus-Liebig University Giessen, Giessen,  
25 Germany.



26 <sup>8</sup> Department of Preventive and Public Health Dentistry, Faculty of Dentistry, Universitas  
27 Indonesia, Depok, Indonesia.

28 <sup>9</sup> Department of Oral & Maxillofacial Surgery, Faculty of Dentistry, Jamia Millia Islamia,  
29 New Delhi, India.

30 <sup>10</sup> Department of Preventive Dental Sciences, College of Dentistry, Imam Abdulrahman Bin  
31 Faisal University, Dammam, Saudi Arabia.

32 <sup>11</sup> Center for Oral Bioengineering, Barts and the London, School of Medicine and Dentistry,  
33 Queen Mary University of London, London, UK, and an assistant lecturer, Department of  
34 Conservative Dentistry, Faculty of Dentistry, Alexandria University, Alexandria, Egypt.

35 <sup>12</sup> Department of Oral Rehabilitation, Faculty of Medicine Foca, University of East Sarajevo,  
36 Bosnia and Herzegovina.

37 <sup>13</sup> Department of Preventive Dentistry, School of Dentistry, Kyungpook National University,  
38 Republic of Korea.

39 <sup>14</sup> Centre for Dental Public Health and Primary Care, Institute of Dentistry, Barts and The  
40 London School of Medicine and Dentistry, Queen Mary University of London, London,  
41 United Kingdom.

42 <sup>15</sup> Department of Dentistry for Children and Adolescents, Universidad Peruana Cayetano  
43 Heredia, Lima, Peru.

44 <sup>16</sup> Oral Diagnosis and General Dentistry department, Dental Hospital, Tokyo Medical and  
45 Dental University, Tokyo, Japan.

46 <sup>17</sup> Department of Biological & Preventive Sciences, College of Dentistry, University of  
47 Science & Technology, Sanaa, Yemen.

48 <sup>18</sup> Department of Oral and Maxillo Facial Sciences, Faculty of Medicine and Dentistry,  
49 Sapienza University of Rome, Rome, Italy.

50 <sup>19</sup> Faculty of Dentistry, Thammasat University, Bangkok, Thailand.

51 <sup>20</sup> Department of Endodontics and Conservative Dentistry, Faculty of Dental Medicine,  
52 University of Strasbourg, Strasbourg 67000, France, and a professor, Department of  
53 Biomaterials and Bioengineering, INSERM UMR\_S 1121, Strasbourg University, Strasbourg  
54 67000, France.

55 <sup>21</sup> Department of Preventive and Community Dentistry, School of Dentistry, Pusan National  
56 University, Republic of Korea.

57 <sup>22</sup> Department of Biomedical Dental Sciences, College of Dentistry, Imam Abdulrahman Bin  
58 Faisal University, Dammam, Saudi Arabia.

59 <sup>23</sup> Department of Community and Preventive Dentistry, Faculty of Dentistry, University of  
60 Benghazi, Libya.

61 <sup>24</sup> Orthodontics and Pediatric Dentistry Department, Faculty of Dentistry, Arab American  
62 University, Palestine.

63 <sup>25</sup> Department of Prosthodontics, University of Dental Medicine, Mandalay, Myanmar.

64 <sup>26</sup> Department of Pediatric Dentistry, Mohammed Bin Rashid University of Medicine and  
65 Health Sciences, Dubai, United Arab Emirates.

66 <sup>27</sup> Department of Pediatric Dentistry, Seoul National University Dental Hospital, Seoul, South  
67 Korea.

68 <sup>28</sup> Department of Pediatric and Preventive Dentistry, School of Dental Medicine, University  
69 of Belgrade, Belgrade, Serbia.

70 <sup>29</sup> Department of Endodontics, University of Salerno, Fisciano, Italy.

71 <sup>30</sup> Department of Paediatric Dentistry & Orthodontics, School of Dental Sciences, University  
72 of Nairobi, Kenya.

73

74 **\*Corresponding author:**

75 Email: [maha\\_tantawy@hotmail.com](mailto:maha_tantawy@hotmail.com) (MET)

## 76 **Abstract**

### 77 **Objective**

78 COVID-19 pandemic led to major life changes. We assessed the psychological impact of  
79 COVID-19 on dental academics globally and on changes in their behaviors.

### 80 **Method**

81 We invited dental academics to complete a cross-sectional, online survey from March to May  
82 2020. The survey was based on the Theory of Planned Behavior (TPB). The survey collected  
83 data on participants' stress levels (using the Impact of Event Scale), attitude (fears, and  
84 worries because of COVID-19 extracted by Principal Component Analysis (PCA)), perceived  
85 control (resulting from training on public health emergencies), norms (country-level COVID-  
86 19 fatality rate), and personal and professional backgrounds. We used multilevel regression  
87 models to assess the association between the study outcome variables (frequent handwashing  
88 and avoidance of crowded places) and explanatory variables (stress, attitude, perceived  
89 control and norms).

### 90 **Results**

91 1862 academics from 28 countries participated in the survey (response rate= 11.3%). Of  
92 those, 53.4% were female, 32.9% were <46 years old and 9.9% had severe stress. PCA  
93 extracted three main factors: fear of infection, worries because of professional  
94 responsibilities, and because of restricted mobility. These factors had significant dose-  
95 dependent association with stress and were significantly associated with more frequent  
96 handwashing (B= 0.56, 0.33, and 0.34) and avoiding crowded places (B= 0.55, 0.30, and  
97 0.28). Low country fatality rates were significantly associated with more handwashing (B= -  
98 2.82) and avoiding crowded places (B= -6.61). Training was not significantly associated with  
99 behavior change (B= -0.01 and -0.11).

## 100 **Conclusions**

101 COVID-19 had a considerable psychologic impact on dental academics. There was a direct,  
102 dose-dependent association between change in behaviors and worries but no association with  
103 training. More change in behaviors was associated with lower country COVID-19 fatality  
104 rates. Fears and stresses were associated with greater adoption of preventive measures against  
105 the pandemic.

106

## 107 **Keywords**

108 Dental faculty; COVID-19; psychological stresses; fear; training; surveys and questionnaires;  
109 multilevel analysis

## 110 **Introduction**

111           The novel coronavirus (COVID-19) pandemic has influenced all life aspects. The  
112 highly contagious nature of the disease and its fatal outcomes led to changes in lifestyle for  
113 many people. (1) These lifestyle changes included social distancing, avoiding public places,  
114 more frequent hand washing, and wearing face masks in public. (2) These changes were  
115 sometimes associated with stress-inducing factors such as temporary unemployment, working  
116 from home, home-schooling of children, lack of physical contact with other family members,  
117 friends, and colleagues, and worrying that loved ones and important others may be infected.  
118 (3,4)

119           Researchers and academics also face the psychological impact of the COVID-19  
120 pandemic. The sudden closure of schools mandated the adoption of e-learning technologies.  
121 This, coupled with the suspension of several research projects (5) and unemployment threats  
122 (6) may have created new stresses and added to already existing mental health conditions  
123 associated with work-life conflict. (7,8)

124           Healthcare workers are at greater risk of COVID-19 infection than the general  
125 population because of their frequent contact with affected individuals. Dental professionals are  
126 especially vulnerable to infections during pandemics. (8) Dental academics – educators who  
127 train dental students – face high levels of stress resulting from heavy work overload in addition  
128 to anxiety and fear attributed to their greater risk of infection during treatment provision in the  
129 dental office, especially during pandemics. (9,10) Mild anxiety during pandemics is natural  
130 and may foster preventive behaviors. (11) However, severe persistent anxiety and fear are  
131 powerful emotions that affect both physical and mental well-being. (12,13)

132           The theory of planned behavior (TPB) posits that behaviors can be predicted by  
133 intentions to engage in these behaviors. (14) These intentions, in turn, are affected by the  
134 control that people perceive they have over their actions, by their attitude toward the behavior

135 and whether they think it is useful, important or desirable, and by the norms they perceive to  
136 be prevailing around them. The TPB was previously used to explain dentists' behaviors  
137 including delivering prevention, (15) reporting suspected violence, (16) and managing drug  
138 users. (17) The change in behaviors among dentists due to the COVID-19 pandemic may be  
139 explained by the TPB including the control they perceive they have over avoiding infection  
140 by the disease because of previous training they received, worries because of the pandemic  
141 which may affect their attitudes and the importance they attach to adopting preventive  
142 behaviors, and the prevailing norms around them regarding the seriousness of the pandemic  
143 based on the fatalities it causes. Adopting preventive measures to avoid infection protects  
144 health care professionals, their families, patients, and the public. It is important to understand  
145 the factors associated with these behaviors and if they are impaired by the levels of stress the  
146 professionals have.

147         This study aimed to assess the psychological impact of the COVID-19 pandemic on  
148 dental academics and on changes in their behaviors as a result of the pandemic in several  
149 countries. The hypothesis of the study was that the TPB components are associated with  
150 change in dental academics' behaviors due to the pandemic.

151

## 152 **Methods**

### 153 **Design**

154         This was a cross-sectional study that used an online, multi-country survey to collect  
155 data from dental academics in several countries around the world between March and May  
156 2020. Ethical approvals for the study were obtained from Alexandria University, Egypt (IRB  
157 00010556)-(IORG 0008839)/6-11-2016) and other institutions in participating countries.

158

## 159 **Participants and sampling**

160           The study participants were a convenience sample of dental academics identified  
161 through emails posted on institutional websites in addition to direct invitation from country  
162 collaborators who reached them through professional social media groups or email lists.  
163 Participants were invited if they were dental educators training students in universities or  
164 institutions at the time of the study regardless of their degree (BDS, master or higher) or title  
165 (professors, associate or assistant professors or less) including clinical instructors and if they  
166 consented to participate.

167           Countries from which participants were recruited are listed in Appendix 1. Sample  
168 size was based on assuming a 95% confidence level, 5% margin of error, and prevalence of  
169 severe stress=10%. (18,19) The calculated number of participants also ensured adequate  
170 power for Principal Component Analysis (PCA) which requires at least 100 participants. (20)

171

## 172 **Study questionnaire**

173           An anonymous, close-ended questionnaire was developed for the study. The  
174 questionnaire consisted of four sections; section 1 included the 15-item Impact of Event Scale  
175 (IES) (21,22) which assessed post-traumatic responses to certain events- in this case,  
176 COVID-19. Its internal consistency and validity were previously demonstrated. (21) In the  
177 present study, its Cronbach alpha was 0.83 indicating high internal consistency. Items were  
178 scored on a 4-point Likert scale; 0= not at all, 1= rarely, 3= sometimes, and 5= often. Adding  
179 the scores of all items gave the total score which was categorized into subclinical, mild stress,  
180 moderate stress, and severe stress using cutoff points of 0-8, 9-25, 26-43, and 44+. (22)  
181 Section 2 included 16 items assessing participants' attitudes toward the impact of the  
182 COVID-19. Participants indicated how much these items caused them worry on a scale from  
183 1 (not worried at all) to 10 (extremely worried). Section 3 assessed participants' agreement

184 with two statements describing change in behavior because of the COVID-19 pandemic  
185 (frequent handwashing and avoiding crowded places) on a scale from 1 (strongly disagree) to  
186 10 (strongly agree). Section 4 was a 9 item close-ended questionnaire about participants'  
187 personal and professional background including sex, age, country, living arrangements,  
188 highest academic degree obtained, whether the participants coordinate courses, have clinical  
189 responsibilities, hold administrative positions, and whether they received training on public  
190 health emergencies (Appendix 2).

191 The questionnaire was uploaded to SurveyMonkey. Participants were asked to select  
192 only one response per question and they were allowed to make one submission. No IPs or  
193 emails were collected to ensure confidentiality. The questionnaire was preceded by a brief  
194 introduction explaining the purpose of the study, assuring participants of the confidentiality  
195 of their responses, and emphasizing that their participation was voluntary. After  
196 SurveyMonkey settings were modified, the survey was tested for face and content validity by  
197 five academics who were not involved in the study to ensure clarity and relevance of the  
198 questionnaire. The questionnaire was developed in English. In addition, two versions were  
199 prepared for use in Iran and Brazil where it was translated by collaborators/ dentists into Farsi  
200 and Portuguese followed by back translation to ensure accuracy.

201

## 202 **Data collection**

203 Survey links were sent to collaborators for distribution to participants who received  
204 the links on their emails or social media groups. Reminders were sent two weeks after the  
205 first invitation email to encourage participation.

206

207

208



## 209 **Analysis**

210 After the survey closure, the Excel sheets were downloaded, cleaned, and imported to  
211 SPSS version 23.0 for analysis (IBM Corp., Armonk, N.Y., USA). Frequencies, percentages,  
212 means, and standard deviations were calculated for descriptive statistics.

213 Prior to PCA, the suitability of data for this analysis was assessed. The Kaiser-Meyer-  
214 Olkin (KMO) measure of sampling adequacy was 0.91 which is above the recommended  
215 value of 0.6. The P-value of Bartlett's test of Sphericity (23) was statistically significant ( $P <$   
216 0.0001), supporting the use of PCA. Major attitude components were, therefore, extracted  
217 from the 16 items in section 2 of the survey. Extraction was based on eigenvalues  $>1$ .  
218 Varimax rotation with Kaiser normalization was used and loading coefficients  $< 0.4$  were  
219 suppressed to facilitate interpretation of factor loading. Regression coefficients of the factors  
220 extracted from the PCA were saved to the dataset and used as explanatory variables for  
221 further analysis.

222 Two types of outcomes were assessed. The first was the stress levels based on the  
223 categories of IES. These were included in a multilevel ordinal logistic regression where the  
224 explanatory variables were the major worries/ attitudes derived from the PCA, the ratio  
225 between the number of COVID-19 deaths to cases per million at country level (fatality rate)  
226 (24) and whether the participant received training to manage public health emergencies. The  
227 model controlled for confounders (personal and professional background factors) which were  
228 introduced as fixed effects and country was included in the model as a random effect factor.  
229 The second set of outcomes was the scores indicating change in behaviors due to the COVID-  
230 19 pandemic (frequent handwashing and avoiding crowded places). These were included in  
231 two multilevel linear regression models with the same explanatory variables representing the  
232 TPB components (major attitude/ worries, fatality rate at country level, and receiving  
233 training) in addition to stress levels. These models also controlled for the confounders

234 (personal and professional background variables) and included country as a random effect  
 235 factor. Regression coefficients (and odds ratios for the ordinal logistic regression model) and  
 236 95% confidence intervals were calculated. Significance was set at 5%.

237

## 238 **Results**

239 Responses were received from 1862 participants from 28 countries with an overall  
 240 response rate= 11.3%. Almost half the participants (53.8%) were from Iran, USA, India,  
 241 Germany and, Indonesia (Appendix 1). About 53.4% were females, 32.9% were >35-45 years  
 242 old, 66.3% were living with partner/ spouse, 48.7% were PhD degree holders, 85.6%  
 243 coordinated courses, 87.4% had clinical responsibilities, 52.9% had administrative positions  
 244 and 51.7% had not received training for public health emergencies. The mean (SD) fatality  
 245 rate at country-level as of May 25<sup>th</sup>, 2020 was 0.06 (0.04) (data not shown in the table). Also,  
 246 9.9% had severe stress, 37.5% had moderate stress and 39.6% had mild stress (Table 1).

247

248 Table 1: Personal and professional background of dental academics and their levels of  
 249 COVID-19- related stress (n= 1862)

| Factors      |         | N (%)      |
|--------------|---------|------------|
| Sex          | Male    | 869 (46.6) |
|              | Female  | 996 (53.4) |
| Age in years | 25-35   | 519 (27.8) |
|              | >35-45  | 614 (32.9) |
|              | >45-55  | 376 (20.2) |
|              | >55- 65 | 256 (13.7) |
|              | >65     | 100 (5.4)  |

|                                                 |                      |             |
|-------------------------------------------------|----------------------|-------------|
| Living arrangements                             | Alone                | 198 (10.6)  |
|                                                 | With parents         | 281 (15.1)  |
|                                                 | With partner/ spouse | 1236 (66.3) |
|                                                 | Shared accommodation | 68 (3.6)    |
|                                                 | Other                | 82 (4.4)    |
| Highest academic degree obtained                | BDS                  | 337 (18.1)  |
|                                                 | MSc                  | 619 (33.2)  |
|                                                 | PhD                  | 909 (48.7)  |
| Coordinates courses                             | No                   | 269 (14.4)  |
|                                                 | Yes                  | 1596 (85.6) |
| Has clinical responsibilities                   | No                   | 235 (12.6)  |
|                                                 | Yes                  | 1630 (87.4) |
| Has administrative position                     | No                   | 878 (47.1)  |
|                                                 | Yes                  | 987 (52.9)  |
| Received training for public health emergencies | No                   | 964 (51.7)  |
|                                                 | Yes                  | 901 (48.3)  |
| Stress levels                                   | Subclinical          | 242 (13.0)  |
|                                                 | Mild                 | 739 (39.6)  |
|                                                 | Moderate             | 700 (37.5)  |
|                                                 | Severe               | 184 (9.9)   |

250

251 Table 2 highlights the PCA and factor loadings for major worries and attitudes related  
 252 to the COVID-19 pandemic. Three components explaining 67.3% of the variance were  
 253 extracted by PCA from the 16 items with factor loadings ranging from 0.735 to 0.823. In the  
 254 first component, seven items had loadings  $\geq 0.735$  and were related to fear of infection. In the

255 second component, five items had loadings  $\geq 0.737$  and were related to worries from  
 256 professional responsibilities. The last component included four items with factor loadings  $\geq$   
 257 0.754 and it was about worries from restricted mobility. The greatest fear of infection was  
 258 that important others would get COVID-19 infection because of the participant (mean= 7.66).  
 259 The greatest worry about professional responsibilities was related to the required material  
 260 during the pandemic (mean= 6.48). The greatest worry because of restricted mobility was  
 261 caused by restricted mobility within the country (mean= 6.70).

262

263 Table 2: Principal Component Analysis and factor loadings for major worries and attitudes  
 264 related to COVID-19 pandemic

|                                                               | Mean (SD)   | Factor loadings   |                               |                     |
|---------------------------------------------------------------|-------------|-------------------|-------------------------------|---------------------|
|                                                               |             | Fear of infection | Professional responsibilities | Restricted mobility |
| Catching COVID-19 infection from a colleague                  | 5.83 (2.74) | 0.768             |                               |                     |
| Catching COVID-19 infection from a patient                    | 7.20 (2.80) | 0.786             |                               |                     |
| Catching COVID-19 infection from a student                    | 5.61 (2.96) | 0.777             |                               |                     |
| Catching COVID-19 infection from a source not related to work | 6.41 (2.61) | 0.735             |                               |                     |
| Important others getting infected with COVID-19 because of me | 7.66 (2.76) | 0.750             |                               |                     |

---

|                                                                                |             |       |
|--------------------------------------------------------------------------------|-------------|-------|
| Important others getting infected                                              |             |       |
| with COVID-19 because of another source                                        | 7.64 (2.48) | 0.747 |
| Patients getting infected with COVID-19                                        | 7.15 (2.63) | 0.755 |
| Finishing open courses satisfactorily because of the COVID-19 outbreak         | 6.18 (2.73) | 0.774 |
| Teaching students required material because of the COVID-19 outbreak           | 6.48 (2.68) | 0.823 |
| Supporting students psychologically during the COVID-19 outbreak               | 6.44 (2.67) | 0.737 |
| Managing online learning during the COVID-19 outbreak                          | 6.45 (2.75) | 0.783 |
| Finishing required reports/ assignments during the COVID-19 outbreak           | 6.23 (2.76) | 0.749 |
| Restricted mobility in my country because of the COVID-19 outbreak             | 6.70 (2.91) | 0.769 |
| Restricted mobility from/ to my country because of the COVID-19 outbreak       | 6.13 (3.24) | 0.817 |
| Restricted mobility affecting sports and social activities because of COVID-19 | 6.33 (2.85) | 0.790 |

---

---

Missing events important to my

career because of the COVID-19

5.96 (2.94)

0.754

outbreak

---

265 KMO= 0.91, P value of Bartlett's test< 0.0001

266 Table 3 highlights the factors associated with stress levels among dental academics.

267 Fear of infection, worries about professional responsibilities and restricted mobility, country-

268 level fatality rate, and previous training on public health emergencies were significantly

269 associated with severe, moderate, and mild stress (P< 0.0001). Fear of infection had a

270 significant, direct, and dose-dependent association with stress with higher scores of fear

271 associated in a gradient with mild (OR=1.186), moderate (OR=1.465), and severe stress

272 (OR= 1.483).

273 Similarly, there was a significant, direct, and dose-dependent association between

274 worries due to professional responsibilities and higher levels of stress: worries were

275 associated in a gradient with mild (OR=1.209), moderate (OR=1.317) and severe stress (OR=

276 1.369). The direct, dose-dependent association between worries due to restricted mobility and

277 stresses also followed a gradient with mild (OR=1.010), moderate (OR=1.302), and severe

278 stress (OR= 1.379).

279 A stronger dose-dependent relationship was observed in the association between

280 country-level fatality rate and severe (OR= 6.893), moderate (OR= 1.539), and mild stresses

281 (OR= 0.947); higher fatality rate was associated with higher odds of severe and moderate

282 stress but lower odds of mild stress. The association between stress levels and receiving

283 training was U shaped; training was associated with higher odds of severe (OR= 1.040) and

284 mild stress (OR= 1.084) and lower odds of moderate stress (OR= 0.971).

285

286

287 Table 3: Factors associated with stress levels among dental academics (n= 1862)

| Stressors                         | OR (95% CI): vs subclinical stress |                          |                          |
|-----------------------------------|------------------------------------|--------------------------|--------------------------|
|                                   | Severe                             | Moderate                 | Mild                     |
| Fear of infection                 | 1.483<br>(1.481, 1.484)*           | 1.465<br>(1.464, 1.466)* | 1.186<br>(1.184, 1.188)* |
| Worries about professional issues | 1.369<br>(1.368, 1.369)*           | 1.317<br>(1.316, 1.318)* | 1.209<br>(1.208, 1.210)* |
| Worries about restricted mobility | 1.379<br>(1.378, 1.380)*           | 1.302<br>(1.300, 1.305)* | 1.010<br>(1.008, 1.012)* |
| COVID-19 fatality rate            | 6.893<br>(6.891, 6.893)*           | 1.539<br>(1.539, 1.540)* | 0.947<br>(0.935, 0.939)* |
| Received training vs not          | 1.040<br>(1.038, 1.042)*           | 0.973<br>(0.971, 0.974)* | 1.084<br>(1.083, 1.086)* |

288 Multilevel ordinal logistic regression controlling for sex, age, living arrangements, highest  
 289 academic degree obtained, course coordination, having clinical responsibilities, having  
 290 administrative positions as fixed factors and country included as a random factor; 48.7%  
 291 correctly classified. OR: odds ratio, CI: confidence interval, \*: statistically significant at P<  
 292 0.05

294 Table 4 shows the factors associated with behavior change as a result of the COVID-  
 295 19 pandemic in multilevel linear regression analysis. Participants agreed that they avoided  
 296 crowded places (mean= 8.14) and washed their hands frequently (mean= 8.06). Compared to  
 297 subclinical stress, severe stress was significantly and directly associated with more frequent  
 298 handwashing (B= 0.93) and avoiding crowded places (B= 0.62). Also, compared to  
 299 subclinical stress, moderate and mild stresses were significantly associated with more

300 frequent handwashing (B= 0.83 and B= 0.67) but had no significant association with avoiding  
 301 crowded places. The dose-dependent associations between stress severity and change in each  
 302 behavior followed a gradient with greater changes reported by participants with higher levels  
 303 of stress.

304 Greater fear of infection, worries about professional responsibilities and worries  
 305 because of restricted mobility were associated with more frequent handwashing (B= 0.56,  
 306 0.33 and 0.34) and more avoidance of crowded places (B= 0.55, 0.30 and 0.28).

307 Higher COVID-19 fatality rates were associated with less frequent handwashing (B= -  
 308 2.82) and less avoidance of crowded places (B= -6.61). The associations between receiving  
 309 training and changes in the two behaviors were not statistically significant (P< 0.05).

310

311 Table 4: Association between change in behaviors due to COVID-19 and stresses, worries,  
 312 COVID-19 fatality rate, and training among dental academics (n= 1862)

| Factors                                     | B (95% CI)            |                         |
|---------------------------------------------|-----------------------|-------------------------|
|                                             | Frequent handwashing  | Avoiding crowded places |
| Change in behavior scale: Mean (SD)         | 8.06 (2.40)           | 8.14 (2.41)             |
| Severe vs subclinical stress                | 0.93 (0.46, 1.40)*    | 0.62 (0.15, 1.10)*      |
| Moderate vs subclinical stress              | 0.83 (0.48, 1.19)*    | 0.33 (-0.03, 0.68)      |
| Mild vs subclinical stress                  | 0.67 (0.33, 1.01)*    | 0.26 (-0.08, 0.60)      |
| Fear of infection                           | 0.56 (0.45, 0.67)*    | 0.55 (0.44, 0.66)*      |
| Worries about professional responsibilities | 0.33 (0.23, 0.44)*    | 0.30 (0.19, 0.40)*      |
| Worries about restricted mobility           | 0.34 (0.24, 0.45)*    | 0.28 (0.18, 0.39)*      |
| COVID-19 fatality rate                      | -2.82 (-5.32, -0.32)* | -6.61 (-9.13, -4.08)*   |



|                          |                     |                     |
|--------------------------|---------------------|---------------------|
| Received training vs not | -0.01 (-0.21, 0.20) | -0.11 (-0.32, 0.10) |
|--------------------------|---------------------|---------------------|

313 Multilevel linear regression controlling for sex, age, living arrangements, highest academic  
314 degree obtained, course coordination, clinical responsibilities, having administrative positions  
315 as fixed factors and country as random factor, B: regression coefficient, CI: confidence  
316 interval, \*: statistically significant at P< 0.05.

317

## 318 Discussion

319 The findings indicated that the COVID-19 pandemic was a stress inducer for dental  
320 academics, with approximately 10% having severe COVID-19-related traumatic stress. The  
321 main sources of stress were fear of contracting infection, restricted mobility due to the  
322 lockdown enforced in most countries to control the spread of the pandemic, and worries  
323 because of professional responsibilities related to teaching and research. Measures taken by  
324 individuals to contain the infection included avoidance of crowded places, and washing hands  
325 more frequently. Training on public health emergencies was significantly associated with  
326 stresses but not with change in behaviors due to the pandemic. A dose-dependent relationship  
327 existed between severity of stresses and worries related to fear of infection, teaching and  
328 research responsibilities and restricted mobility. A direct, dose-dependent relationship also  
329 existed between stress levels and change in behaviors due to the pandemic. Dose-dependent  
330 associations were suggested by Hill among the criteria supporting causality in observational  
331 studies when clinical trials cannot be conducted. (25) However, dose-dependent associations  
332 are not proof of causality on their own and the most important criterion of causality; time  
333 sequence where exposure precedes outcome, can only be ascertained in a longitudinal study.  
334 The study hypothesis was, thus, partly supported: not all components of the TPB were  
335 significantly associated with change in behaviors due to COVID-19.

336 One of the strengths of the study was the diversity of countries represented by the  
337 study participants. This enabled the study to generate data representing different educational  
338 systems and backgrounds thereby increasing the generalizability of the findings. Also, the  
339 study used validated tools with high internal consistency and/ or factor loadings. In addition,  
340 the study captured the psychological impact of the pandemic at its early stages thus providing  
341 important and valuable information that can be used in designing support systems for dental  
342 academics.

343 The study, however, had some limitations. First, data were collected at different  
344 stages of the pandemic in various countries and this may have confounded the assessment of  
345 the level of stress. In addition, the study was cross-sectional and thus, cannot prove causality.  
346 Also, the response rate was low similar to previous research (26) and this may be attributed to  
347 the psychological impact of the pandemic with resulting possible underestimation of the level  
348 of stress reported in the study since those with higher levels of stress may be more likely to  
349 ignore the survey. Despite these limitations, the study highlights the psychological impact of  
350 the pandemic on dental educators who are critical stakeholders in the education and  
351 healthcare sectors. As countries pass through the first wave of the pandemic, more attention  
352 will need to be paid to the psychological impact of the pandemic on people's lives because of  
353 its possible effect on productivity, wellbeing, health, and quality of life. (27)

354 We found a direct association between fears and worries and behavior changes in  
355 agreement with previous studies including British adults (28), a nationally representative  
356 sample of Americans (29) and lay persons from ten countries in Europe, America and Asia.  
357 (30) These studies reported an association between perceived risk of infection, fatality risk or  
358 negative emotions such as fear and anxiety and greater adoption of COVID-19 preventive  
359 behaviors such as hand hygiene and social distancing. Our findings and those of other studies

360 suggest that fear may trigger a protective reaction through the adoption of preventive  
361 measures to reduce risks.

362 Lower COVID-19 fatality rates were observed in countries where dental academics  
363 reported more frequent handwashing and more avoidance of crowded places. Dental  
364 academics' COVID-19-related behaviors reflect the behaviors of the general populations.  
365 Risk reduction communication undertaken as part of the public health response might have  
366 led to the adoption of COVID-19 preventive measures resulting in lower rates of COVID-19  
367 spread and fatality. However, the cross-sectional design of the study does not show time  
368 sequence and the direction of the relationship between fatality rates and adoption of  
369 preventive measures cannot be elucidated. Future longitudinal studies are needed to establish  
370 cause and effect and allow the disentanglement of these complex associations.

371 The present study showed a 10% prevalence of severe COVID-19-induced stress  
372 among dental academics; a higher level than the 7% reported among the general public in  
373 Wuhan, China (18) and 8.7% general anxiety reported among Italian dentists (19) and similar  
374 to the 11.5% among Israeli dentists and dental hygienists. (31) This indicates a need to  
375 provide support for dental academics' mental health. In addition, fear and anxiety among the  
376 educators may have a detrimental effect on dental students with long-lasting consequences on  
377 the profession. Few universities have instituted mental health support programs for their staff  
378 and students to cope with stresses even before the pandemic crisis. (32)

379 In the present study, COVID-19 was associated with severe stresses because of  
380 restricted mobility caused by isolation and quarantine, (33) as observed in past epidemics like  
381 the Ebola (34) and MERS. (35) The fear of transmitting infections to important others and  
382 loved ones was another COVID-19-related stress inducing factor observed in the present  
383 study similar to that reported by dentists from 30 countries in a previous study, (4) and it had  
384 a dose-dependent association similar to what was observed among Israeli dentists. (31)

385           At the present time when the pandemic spreads and death toll rises, it was hoped that  
386 training would prepare dental academics to adopt preventive measures. Our results, however,  
387 showed no significant effect of previous training on changing behaviors. Training on public  
388 health emergencies was associated with less stress up to a certain level beyond which the  
389 higher awareness of risks brought about by training was associated with more rather than less  
390 stress. Thus, whether in relation to change in behavior or reducing stresses, training was not  
391 associated with greater perceived control. This may be attributed to the generic nature  
392 training the academics received which did not address the specific needs related to COVID-  
393 19 prevention. This implies that appropriate responses to COVID-19 will require specific and  
394 tailored training different from the standard training for public health emergencies.

395

## 396 **Conclusion**

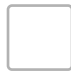

397           The present study showed a considerable psychologic impact of the COVID-19  
398 pandemic on dental academics that was directly associated with fear of infection and worries  
399 because of professional responsibilities and restricted mobility. Changes in behaviors due to  
400 the pandemic and greater adoption of preventive measures were associated with stresses and  
401 worries in a direct and dose-dependent relationship but were not associated with training.  
402 Greater adoption of preventive measures was inversely related to COVID-19 fatality rates at  
403 country level.

404

## 405 **Acknowledgments**

406           We are grateful to all the academics who kindly responded to the survey and  
407 answered our questions in these difficult times.

## 408 **References**

- 409 1. Gralinski LE, Menachery VD. Return of the coronavirus: 2019-nCoV. *Viruses*.  
410 2020;12(2).
- 411 2. World Health Organization. Coronavirus disease (COVID-19) advice for the public  
412 [Internet]. 2020 [cited 2020 Jun 20]. Available from:  
413 <https://www.who.int/emergencies/diseases/novel-coronavirus-2019/advice-for-public>
- 414 3. World Health Organization. Mental health and COVID-19 [Internet]. 2020 [cited 2020  
415 Jun 20]. Available from: [https://www.who.int/teams/mental-health-and-substance-](https://www.who.int/teams/mental-health-and-substance-use/covid-19)  
416 [use/covid-19](https://www.who.int/teams/mental-health-and-substance-use/covid-19)
- 417 4. Ahmed MA, Jouhar R, Ahmed N, Adnan S, Aftab M, Zafar MS, et al. Fear and  
418 Practice Modifications among Dentists to Combat Novel Coronavirus Disease  
419 (COVID-19) Outbreak. *Int J Environ Res Public Health* [Internet]. 2020 Apr 19 [cited  
420 2020 Jun 20];17(8):2821. Available from: [https://www.mdpi.com/1660-](https://www.mdpi.com/1660-4601/17/8/2821)  
421 [4601/17/8/2821](https://www.mdpi.com/1660-4601/17/8/2821)
- 422 5. The United Nations Educational Scientific and Cultural Organization, Caribbean II for  
423 HE in LA and the. COVID-19 and higher education: Today and tomorrow [Internet].  
424 2020 [cited 2020 Jun 20]. Available from: [http://www.iesalc.unesco.org/en/wp-](http://www.iesalc.unesco.org/en/wp-content/uploads/2020/04/COVID-19-EN-090420-2.pdf)  
425 [content/uploads/2020/04/COVID-19-EN-090420-2.pdf](http://www.iesalc.unesco.org/en/wp-content/uploads/2020/04/COVID-19-EN-090420-2.pdf)
- 426 6. McKibbin WJ, Fernando R. The Global Macroeconomic Impacts of COVID-19: Seven  
427 Scenarios. *SSRN Electron J* [Internet]. 2020 Mar 5 [cited 2020 Jun 20]; Available  
428 from: <https://papers.ssrn.com/abstract=3547729>
- 429 7. Gail Kinman, Siobhan Wray. Higher stress A SURVEY OF STRESS AND WELL-  
430 BEING AMONG STAFF IN HIGHER EDUCATION [Internet]. 2013 Jul [cited 2020  
431 Jun 20]. Available from: [www.ucu.org.uk](http://www.ucu.org.uk)
- 432 8. Meng L, Hua F, Bian Z. Coronavirus Disease 2019 (COVID-19): Emerging and Future

- 433 Challenges for Dental and Oral Medicine. *J Dent Res*. 2020 May 1;99(5):481–7.
- 434 9. Rutter H, Herzberg J, Paice E. Stress in doctors and dentists who teach. *Med Educ*  
435 [Internet]. 2002 Jun 1 [cited 2020 Jun 20];36(6):543–9. Available from:  
436 <http://doi.wiley.com/10.1046/j.1365-2923.2002.01229.x>
- 437 10. Pereira LJ, Pereira CV, Murata RM, Pardi V, Pereira-Dourado SM. Biological and  
438 social aspects of Coronavirus Disease 2019 (COVID-19) related to oral health. *Braz*  
439 *Oral Res*. 2020;34.
- 440 11. Vinkers CH, van Amelsvoort T, Bisson JI, Branchi I, Cryan JF, Domschke K, et al.  
441 Stress resilience during the coronavirus pandemic. *Eur Neuropsychopharmacol*. 2020  
442 Jun 1;35:12–6.
- 443 12. Balon R. Mood, anxiety, and physical illness: Body and mind, or mind and body?  
444 *Depress Anxiety*. 2006;23(6):377–87.
- 445 13. Vindegaard N, Eriksen Benros M. COVID-19 pandemic and mental health  
446 consequences: Systematic review of the current evidence. *Brain Behav Immun*. 2020;
- 447 14. Ajzen I. The theory of planned behavior. *Organ Behav Hum Decis Process*. 1991 Dec  
448 1;50(2):179–211.
- 449 15. Yusuf H, Kolliakou A, Ntouva A, Murphy M, Newton T, Tsakos G, et al. Predictors of  
450 dentists' behaviours in delivering prevention in primary dental care in England: using  
451 the theory of planned behaviour. *BMC Health Serv Res*. 2015;16(1):1–7.
- 452 16. El Tantawi M, Gaffar B, Arheiam A, Abdelaziz W, Al-Batayneh OB, Alhoti MF, et al.  
453 Dentists' intention to report suspected violence: A cross-sectional study in eight Arab  
454 countries. *BMJ Open* [Internet]. 2018 Mar 1 [cited 2020 Jun 21];8(3). Available from:  
455 <https://pubmed.ncbi.nlm.nih.gov/29602845/>
- 456 17. El Tantawi M, AlJameel ABH, Fita S, AlSahan B, Alsuwaiyan F, El Meligy O.  
457 Dentists' intentions to manage drug users: Role of theory of planned behaviour and

- 458 continuing education. *Eur J Dent Educ.* 2019 Aug 1;23(3):364–72.
- 459 18. Liu N, Zhang F, Wei C, Jia Y, Shang Z, Sun L, et al. Prevalence and predictors of  
460 PTSS during COVID-19 outbreak in China hardest-hit areas: Gender differences  
461 matter. *Psychiatry Res.* 2020 May 1;287:112921.
- 462 19. Consolo U, Bellini P, Bencivenni D, Iani C, Checchi V. Epidemiological Aspects and  
463 Psychological Reactions to COVID-19 of Dental Practitioners in the Northern Italy  
464 Districts of Modena and Reggio Emilia. *Int J Environ Res Public Health* [Internet].  
465 2020 May 15 [cited 2020 Jun 20];17(10):3459. Available from:  
466 <https://www.mdpi.com/1660-4601/17/10/3459>
- 467 20. Abdi H, Williams LJ. Principal component analysis. *Wiley Interdiscip Rev Comput*  
468 *Stat.* 2010;2(4):433–59.
- 469 21. Horowitz M, Wilner N, Alvarez W. Impact of event scale: A measure of subjective  
470 stress. *Psychosom Med.* 1979;41(3):209–18.
- 471 22. Kolokotroni F. Impact of Event Scale BT - Encyclopedia of Quality of Life and Well-  
472 Being Research. In: Michalos AC, editor. Dordrecht: Springer Netherlands; 2014. p.  
473 3102–5. Available from: [https://doi.org/10.1007/978-94-007-0753-5\\_1377](https://doi.org/10.1007/978-94-007-0753-5_1377)
- 474 23. Bartlett MS. A note of the multiplying factors for various chi square approximations. *J*  
475 *R Stat Soc.* 1954;Series B(16):296–298.
- 476 24. Worldometer. Coronavirus Cases. Worldometer. 2020. p. 1–22.
- 477 25. HILL AB. THE ENVIRONMENT AND DISEASE: ASSOCIATION OR  
478 CAUSATION? *Proc R Soc Med* [Internet]. 1965 May;58(5):295–300. Available from:  
479 <https://pubmed.ncbi.nlm.nih.gov/14283879>
- 480 26. Funkhouser E, Vellala K, Baltuck C, Cacciato R, Durand E, McEdward D, et al.  
481 Survey Methods to Optimize Response Rate in the National Dental Practice–Based  
482 Research Network. *Eval Heal Prof* [Internet]. 2017 Sep 1 [cited 2020 Jun

- 483 21];40(3):332–58. Available from: <https://pubmed.ncbi.nlm.nih.gov/26755526/>
- 484 27. Horesh D, Brown AD. Covid-19 response: Traumatic stress in the age of Covid-19: A  
485 call to close critical gaps and adapt to new realities. *Psychol Trauma Theory, Res Pract*  
486 *Policy* [Internet]. 2020 [cited 2020 Jun 20];12(4):331–5. Available from:  
487 <https://pubmed.ncbi.nlm.nih.gov/32271070/>
- 488 28. Harper CA, Satchell LP, Fido D, Latzman RD. Functional Fear Predicts Public Health  
489 Compliance in the COVID-19 Pandemic. *Int J Ment Health Addict* [Internet]. 2020  
490 [cited 2020 Jun 20];1. Available from: </pmc/articles/PMC7185265/?report=abstract>
- 491 29. de Bruin WB, Bennett D. Relationships Between Initial COVID-19 Risk Perceptions  
492 and Protective Health Behaviors: A National Survey. *Am J Prev Med* [Internet]. 2020  
493 May [cited 2020 Jun 20];0(0). Available from:  
494 <http://www.ajpmonline.org/article/S0749379720302130/fulltext>
- 495 30. Dryhurst S, Schneider CR, Kerr J, Freeman ALJ, Recchia G, van der Bles AM, et al.  
496 Risk perceptions of COVID-19 around the world. *J Risk Res* [Internet]. 2020 May 5  
497 [cited 2020 Jun 20];1–13. Available from:  
498 <https://www.tandfonline.com/doi/full/10.1080/13669877.2020.1758193>
- 499 31. Shacham M, Hamama-Raz Y, Kolerman R, Mijiritsky O, Ben-Ezra M, Mijiritsky E.  
500 COVID-19 Factors and Psychological Factors Associated with Elevated Psychological  
501 Distress among Dentists and Dental Hygienists in Israel. *Int J Environ Res Public*  
502 *Health* [Internet]. 2020 Apr 22 [cited 2020 Jun 20];17(8):2900. Available from:  
503 <https://www.mdpi.com/1660-4601/17/8/2900>
- 504 32. Fernandez A, Howse E, Rubio-Valera M, Thorncraft K, Noone J, Luu X, et al. Setting-  
505 based interventions to promote mental health at the university: a systematic review. *Int*  
506 *J Public Health*. 2016;61(7):797–807.
- 507 33. Brooks SK, Webster RK, Smith LE, Woodland L, Wessely S, Greenberg N, et al. The



- 508 psychological impact of quarantine and how to reduce it: rapid review of the evidence.  
509 Lancet [Internet]. 2020 Mar 14 [cited 2020 Jun 20];395(10227):912–20. Available  
510 from: /pmc/articles/PMC7158942/?report=abstract
- 511 34. Caleo G, Duncombe J, Jephcott F, Lokuge K, Mills C, Looijen E, et al. The factors  
512 affecting household transmission dynamics and community compliance with Ebola  
513 control measures: A mixed-methods study in a rural village in Sierra Leone. BMC  
514 Public Health [Internet]. 2018 Feb 13 [cited 2020 Jun 20];18(1). Available from:  
515 /pmc/articles/PMC5812186/?report=abstract
- 516 35. Jeong H, Yim HW, Song YJ, Ki M, Min JA, Cho J, et al. Mental health status of  
517 people isolated due to Middle East Respiratory Syndrome. Epidemiol Health  
518 [Internet]. 2016 [cited 2020 Jun 20];38:e2016048. Available from:  
519 <https://pubmed.ncbi.nlm.nih.gov/28196409/>
- 520

## 521 **Supporting information**

- 522 **Appendix 1 (This is the ‘S1 Appendix 1.pdf’ file):** Countries participating in the study and  
523 number of participants
- 524 **Appendix 2 (This is the ‘S2 Appendix 2.pdf’ file):** Survey for dental academics' stresses at  
525 the time of the COVID-19 outbreak

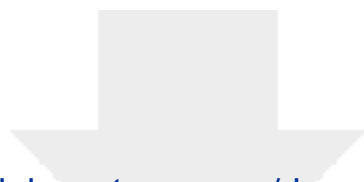

Click here to access/download  
**Supporting Information**  
S1 Appendix 1.pdf

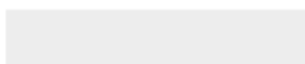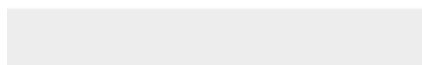

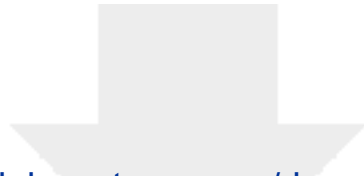

Click here to access/download  
**Supporting Information**  
S2 Appendix 2.pdf

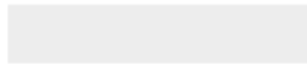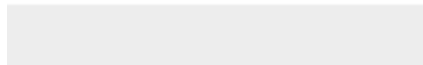

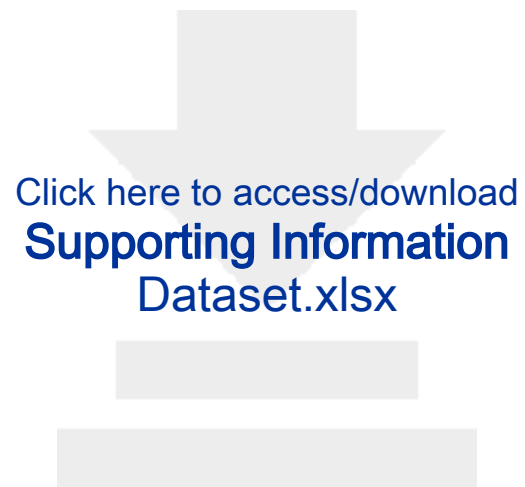

Click here to access/download  
**Supporting Information**  
Dataset.xlsx



Click here to access/download  
**Supporting Information**  
Related submission.docx

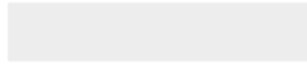

Supplement: pone.0239961.s004.pdf [file pone.0239961.s004.pdf]
