# Supplementary material for: Behavior change due to COVID-19 among dental academics—The theory of planned behavior: Stresses, worries, training, and pandemic severity
Source: PubMed Central journal article supplement (PMC7523990; doi:10.1371/journal.pone.0239961), 2020-09-29
Supplement: pone.0239961.s001.pdf [file pone.0239961.s001.pdf]

## Appendix 1

Table 1: Countries participating in the study and number of participants

| Country   | Number of invited academics | Number of participants | Percentage to all participants | Response rate |
|-----------|-----------------------------|------------------------|--------------------------------|---------------|
| Bosnia    | 100                         | 55                     | 3.0                            | 55.0          |
| Brazil    | 1350                        | 104                    | 5.6                            | 7.7           |
| Denmark   | 71                          | 10                     | 0.5                            | 14.1          |
| Egypt     | 310                         | 85                     | 4.6                            | 27.4          |
| France    | 630                         | 30                     | 1.6                            | 4.8           |
| Germany   | 1400                        | 149                    | 8.0                            | 10.6          |
| India     | 1662                        | 208                    | 11.2                           | 12.5          |
| Indonesia | 200                         | 129                    | 6.9                            | 64.5          |
| Iran      | 700                         | 268                    | 14.4                           | 38.3          |
| Italy     | 527                         | 51                     | 2.7                            | 9.7           |
| Japan     | 280                         | 89                     | 4.8                            | 31.8          |
| Jordan    | 100                         | 67                     | 3.6                            | 67.0          |
| Kenya     | 60                          | 4                      | 0.2                            | 6.7           |
| Korea     | 220                         | 31                     | 1.7                            | 14.1          |
| KSA       | 90                          | 51                     | 2.7                            | 56.7          |
| Libya     | 103                         | 14                     | 0.8                            | 13.6          |
| Myanmar   | 100                         | 13                     | 0.7                            | 13.0          |
| Nigeria   | 86                          | 54                     | 2.9                            | 62.8          |
| Norway    | 70                          | 7                      | 0.4                            | 10.0          |
| Palestine | 53                          | 13                     | 0.7                            | 24.5          |

|          |        |       |      |      |
|----------|--------|-------|------|------|
| Peru     | 150    | 13    | 0.7  | 8.7  |
| Serbia   | 400    | 9     | 0.5  | 2.3  |
| Syria    | 150    | 12    | 0.6  | 8.0  |
| Thailand | 470    | 34    | 1.8  | 7.2  |
| UAE      | 77     | 12    | 0.6  | 15.6 |
| UK       | 150    | 56    | 3.0  | 37.3 |
| USA      | 6820   | 248   | 13.3 | 3.6  |
| Yemen    | 200    | 46    | 2.5  | 23.0 |
| Total    | 16,529 | 1,862 | 100  | 11.3 |
